# Supplementary material for: Highly conductive, binary ionic liquid–solvent mixture ion gels for effective switching of electrolyte-gated transistors
Source: Royal Society of Chemistry journal article supplement (doi:10.1039/c8tc03076f), 2018-01-01
Supplement: c8tc03076f1.pdf [file c8tc03076f1.pdf]

**Supporting Information for**

# Highly Conductive, Binary Ionic Liquid-Solvent Mixture Ion Gels for Effective Switching of Electrolyte-Gated Transistors

*Kyoung Hwan Seol,<sup>†</sup> Seung Ju Lee,<sup>†</sup> Kyung Gook Cho,<sup>†</sup> Kihyon Hong,<sup>‡\*</sup> and Keun Hyung*

*Lee<sup>†\*</sup>*

<sup>†</sup>Department of Chemistry and Chemical Engineering, Inha University, Incheon 22212, Republic of Korea

<sup>‡</sup> Department of Materials Science and Engineering, Chungnam National University, Daejeon 305-764, Republic of Korea

\*To whom correspondence should be addressed: [kh.lee@inha.ac.kr](mailto:kh.lee@inha.ac.kr) (K.H.L);  
[khong@cnu.ac.kr](mailto:khong@cnu.ac.kr) (K.H.)

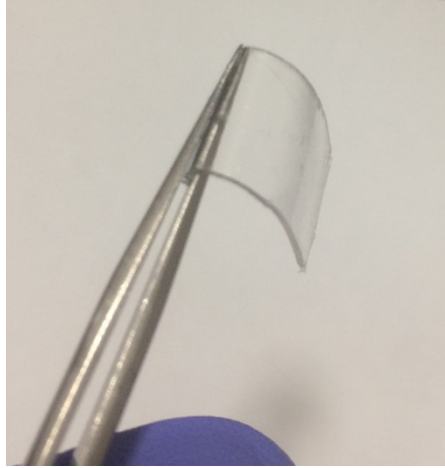

**Figure S1.** An optical image of the organogel based on pure PC and PVDF-HFP with a weight ratio of 4 : 1.

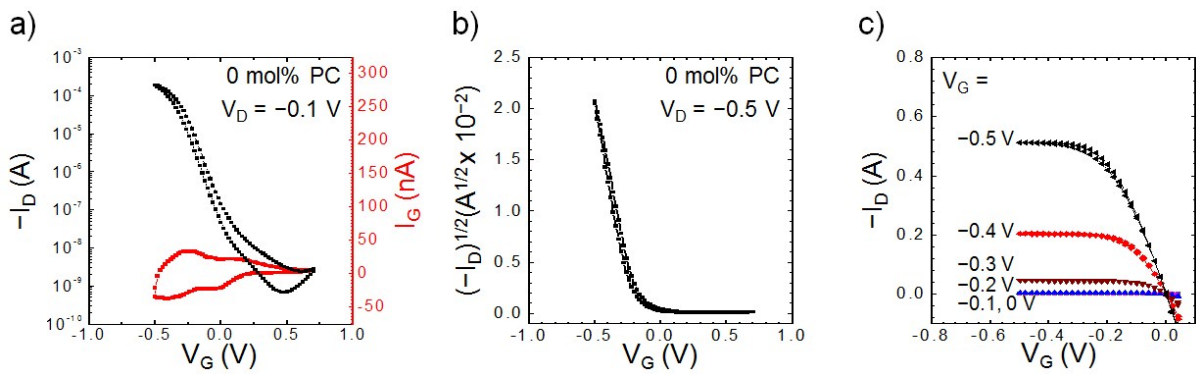

**Figure S2.** Representative characteristics of the P3HT transistor gated with the mixed ion gel containing 0 mol% of the molecular additive PC. (a)  $I_D$ - $V_G$  (black) and  $I_G$ - $V_G$  (red) data in the linear regime ( $V_D = -0.1$  V). (b)  $I_D^{0.5}$ - $V_G$  data measured in the saturation regime ( $V_D = -0.5$  V). (c)  $I_D$ - $V_D$  output data.

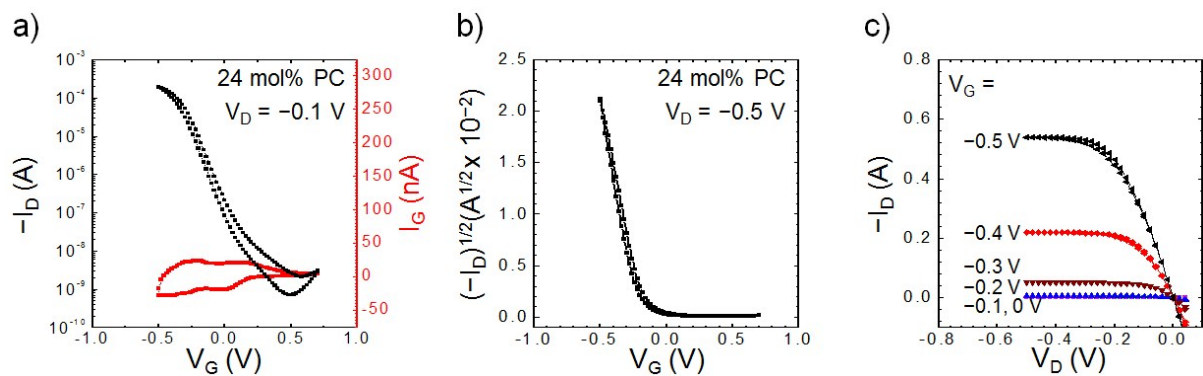

**Figure S3.** Representative characteristics of the P3HT transistor gated with the mixed ion gel containing 24 mol% of the molecular additive PC. (a)  $I_D$ - $V_G$  (black) and  $I_G$ - $V_G$  (red) data in the linear regime ( $V_D = -0.1$  V). (b)  $I_D^{0.5}$ - $V_G$  data measured in the saturation regime ( $V_D = -0.5$  V). (c)  $I_D$ - $V_D$  output data.

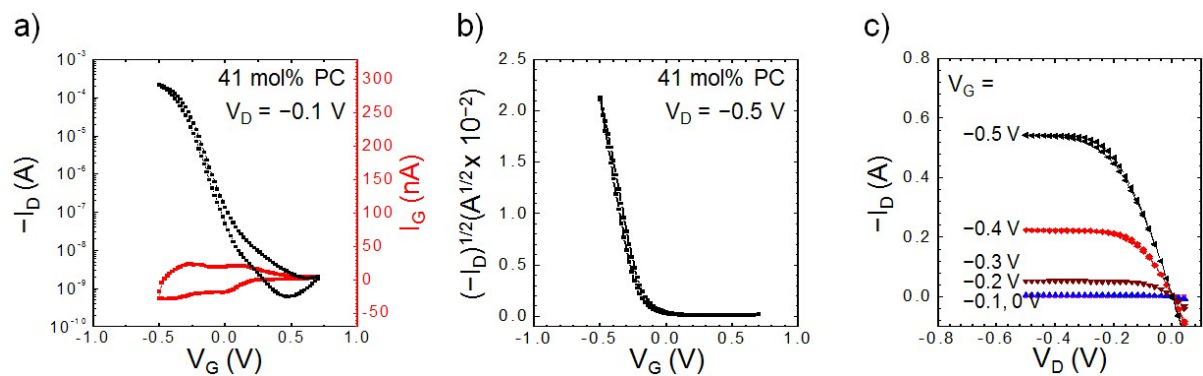

**Figure S4.** Representative characteristics of the P3HT transistor gated with the mixed ion gel containing 41 mol% of the molecular additive PC. (a)  $I_D$ - $V_G$  (black) and  $I_G$ - $V_G$  (red) data in the linear regime ( $V_D = -0.1$  V). (b)  $I_D^{0.5}$ - $V_G$  data measured in the saturation regime ( $V_D = -0.5$  V). (c)  $I_D$ - $V_D$  output data.

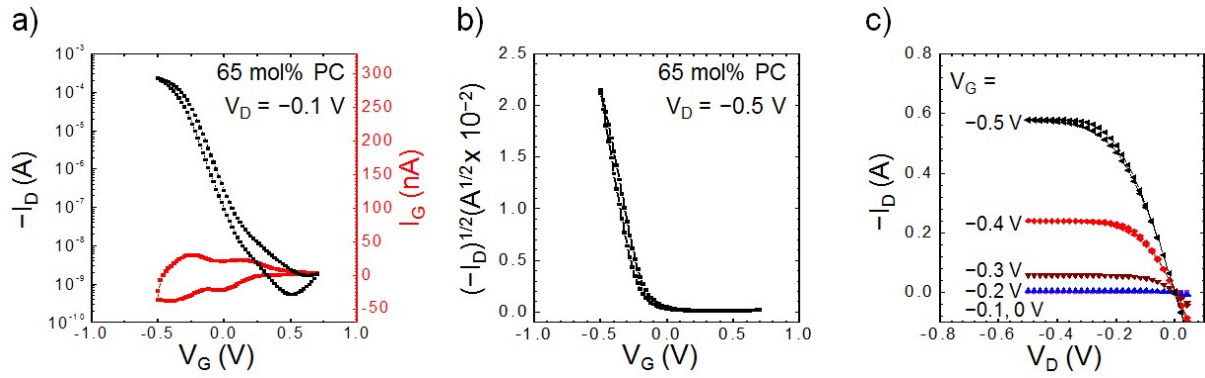

**Figure S5.** Representative characteristics of the P3HT transistor gated with the mixed ion gel containing 65 mol% of the molecular additive PC. (a)  $I_D$ - $V_G$  (black) and  $I_G$ - $V_G$  (red) data in the linear regime ( $V_D = -0.1$  V). (b)  $I_D^{0.5}$ - $V_G$  data measured in the saturation regime ( $V_D = -0.5$  V). (c)  $I_D$ - $V_D$  output data.

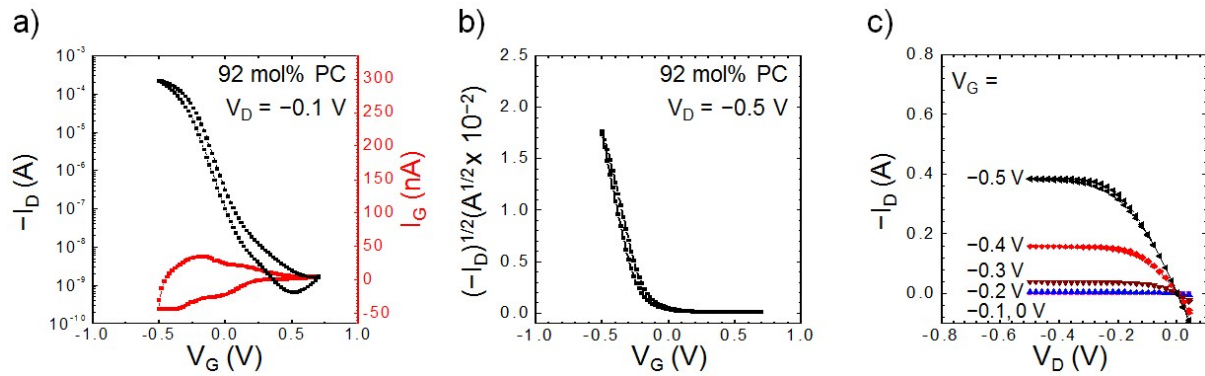

**Figure S6.** Representative characteristics of the P3HT transistor gated with the mixed ion gel containing 92 mol% of the molecular additive PC. (a)  $I_D$ - $V_G$  (black) and  $I_G$ - $V_G$  (red) data in the linear regime ( $V_D = -0.1$  V). (b)  $I_D^{0.5}$ - $V_G$  data measured in the saturation regime ( $V_D = -0.5$  V). (c)  $I_D$ - $V_D$  output data.

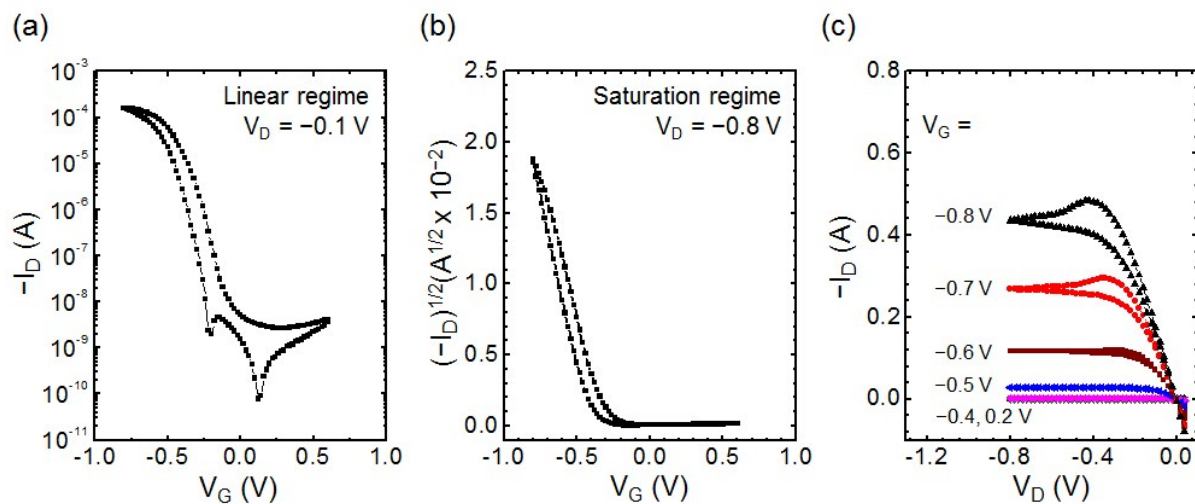

**Figure S7.** (a) Representative  $I_D$ - $V_G$  transfer data in the linear regime ( $V_D = -0.1$  V) obtained for the P3HT transistor gated with a PEO/LiClO<sub>4</sub> polymer electrolyte. (b)  $I_D^{0.5}$ - $V_G$  data measured in the saturation regime ( $V_D = -0.8$  V). (c) Representative  $I_D$ - $V_D$  output data.
